# Supplementary material for: New Insights into the Mechanism of Antibacterial Action of Synthetic Peptide Mo-CBP3-PepI against Klebsiella pneumoniae
Source: MDPI journal article supplement (doi:10.3390/antibiotics11121753), 2022-12-04
Supplement: s1 [file s1]

**A**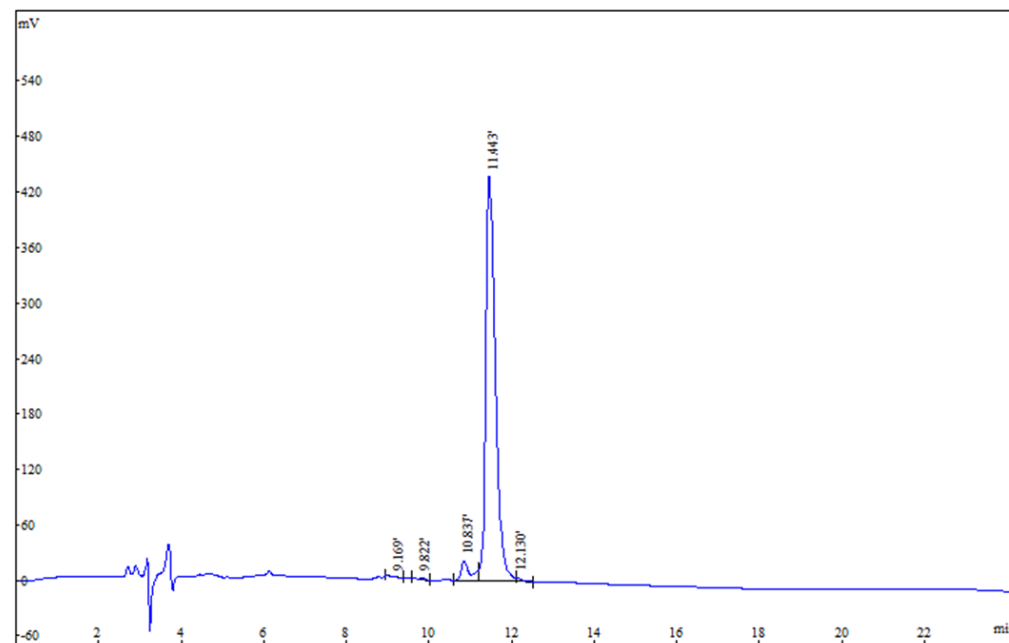**B**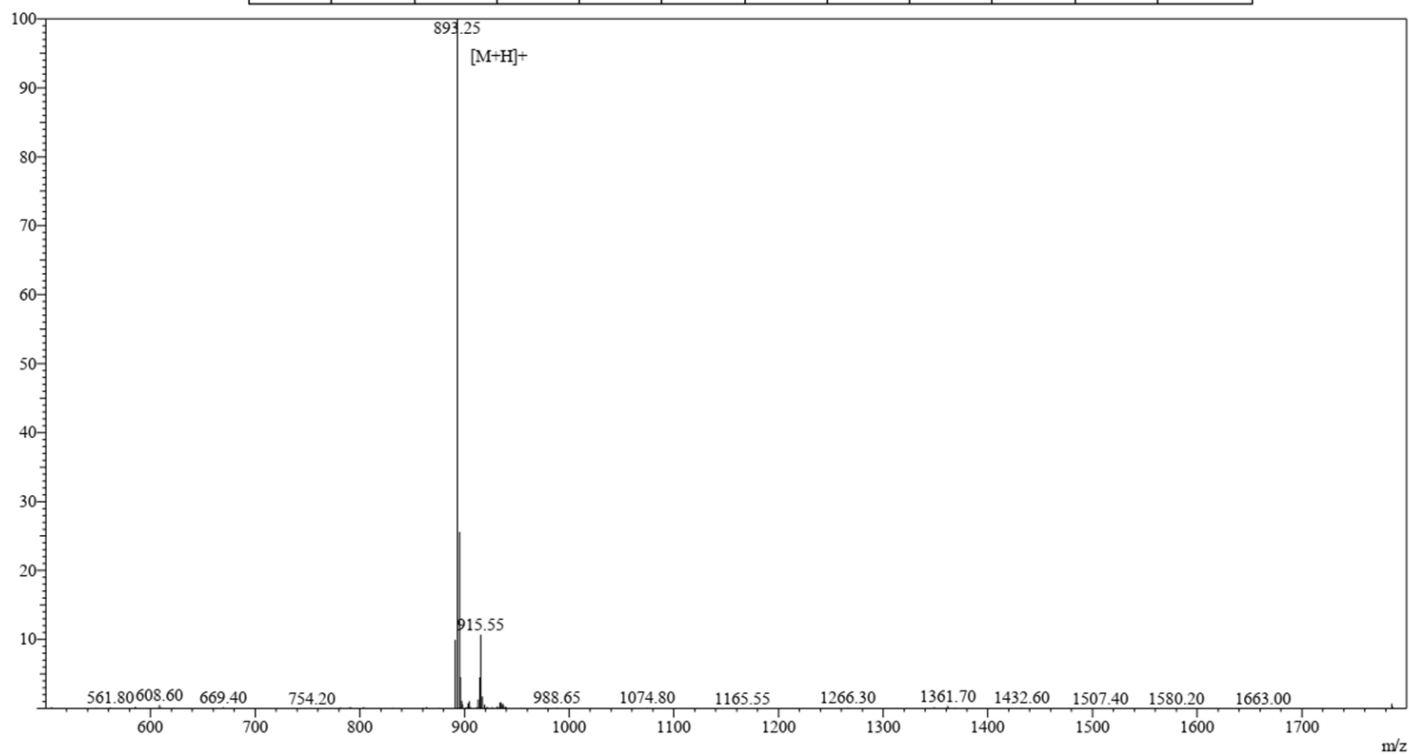

**Supplementary Figure S1. Purity and quality of synthesis process of *Mo*-CBP<sub>3</sub>-PepI.** (A) reverse-phase high performance liquid chromatography to the purity of *Mo*-CBP<sub>3</sub>-PepI. (B) MS/MS data analysis corroborating the result of HPLC analysis.

**Supplementary Table S1 – *Mo*-CBP<sub>3</sub>-PepI group unique proteins identified by ESI-LC-MS/MS**

| Protein Name                                                    | ID Uniprot | Organism Reference                                                               | Cellular Compartment |
|-----------------------------------------------------------------|------------|----------------------------------------------------------------------------------|----------------------|
| <b><u>Carbohydrate metabolism</u></b>                           |            |                                                                                  |                      |
| 3-dehydro-D-guloside 4-epimerase                                | P76044     | <i>Escherichia coli</i> (strain K12)                                             | Cytoplasm            |
| D-xylonate dehydratase YjhG                                     | P39358     | <i>Escherichia coli</i> (strain K12)                                             | Cytoplasm            |
| Apulose kinase                                                  | Q6D5T8     | <i>Pectobacterium atrosepticum</i><br>(strain SCRI 1043 / ATCC BAA-672)          | Cytoplasm            |
| <b><u>Lipid metabolism</u></b>                                  |            |                                                                                  |                      |
| 7alpha-hydroxysteroid dehydrogenase                             | P0AET8     | <i>Escherichia coli</i> (strain K12)                                             | Cytoplasm            |
| Acetyl-coenzyme A carboxylase carboxyl transferase subunit beta | P0A9Q5     | <i>Escherichia coli</i> (strain K12)                                             | Cytoplasm            |
| Fatty acid oxidation complex subunit alpha                      | P21177     | <i>Escherichia coli</i> (strain K12)                                             | Cytoplasm            |
| 3-ketoacyl-CoA thiolase                                         | Q48GW4     | <i>Pseudomonas savastanoi</i> pv.<br><i>phaseolicola</i> (strain 1448A / Race 6) | Cytoplasm            |
| Lipid-A-disaccharide synthase                                   | B7V7U5     | <i>Pseudomonas aeruginosa</i><br>(strain LESB58)                                 | Cytoplasm            |
| Glycerol-3-phosphate acyltransferase                            | Q1GYU3     | <i>Methylobacillus flagellatus</i><br>(strain KT / ATCC 51484 / DSM 6875)        | Plasma membrane      |
| 3-hydroxyacyl-[acyl-carrier-protein] dehydratase FabZ           | B9DY11     | <i>Clostridium kluyveri</i> (strain NBRC 12016)                                  | Cytoplasm            |
| 4-hydroxy-2-oxovalerate aldolase 1                              | Q47G67     | <i>Dechloromonas aromatica</i><br>(strain RCB)                                   | Cytoplasm            |

### Cell Redox Homeostasis

|                                                               |        |                                      |                   |
|---------------------------------------------------------------|--------|--------------------------------------|-------------------|
| Hydroxylamine reductase                                       | P75825 | <i>Escherichia coli</i> (strain K12) | Cytoplasm         |
| Periplasmic serine endoprotease DegP                          | P0C0V0 | <i>Escherichia coli</i> (strain K12) | Cytoplasm         |
| Protein-methionine-sulfoxide reductase catalytic subunit MsrP | P76342 | <i>Escherichia coli</i> (strain K12) | Periplasmic space |
| Catalase-peroxidase                                           | Q1GCU3 | <i>Ruegeria sp.</i> (strain TM1040)  | Cytoplasm         |

### Stress and Defense Response

|                                                     |        |                                                                                                     |                   |
|-----------------------------------------------------|--------|-----------------------------------------------------------------------------------------------------|-------------------|
| Probable L,D-transpeptidase YcbB                    | P22525 | <i>Escherichia coli</i> (strain K12)                                                                | Plasma membrane   |
| Zinc resistance-associated protein                  | P0AAA9 | <i>Escherichia coli</i> (strain K12)                                                                | Periplasmic space |
| Chaperone protein HtpG                              | P0A6Z3 | <i>Escherichia coli</i> (strain K12)                                                                | Cytoplasm         |
| Co-chaperonin GroES                                 | B5F2K9 | <i>Salmonella agona</i> (strain SL483)                                                              | Cytoplasm         |
| ATP-dependent Clp protease ATP-binding subunit ClpX | Q2RU44 | <i>Rhodospirillum rubrum</i> (strain ATCC 11170 / ATH 1.1.1 / DSM 467 / LMG 4362 / NCIMB 8255 / S1) | Cytoplasm         |
| Chaperone protein DnaJ                              | Q5FGQ8 | <i>Ehrlichia ruminantium</i> (strain Gardel)                                                        | Cytoplasm         |

### Energy and Metabolism

|                                                                         |        |                                      |           |
|-------------------------------------------------------------------------|--------|--------------------------------------|-----------|
| Multiphosphoryl transfer protein 1                                      | P77439 | <i>Escherichia coli</i> (strain K12) | Cytoplasm |
| Alpha-D-ribose 1-methylphosphonate 5-triphosphate synthase subunit PhnG | P16685 | <i>Escherichia coli</i> (strain K12) | Unknown   |
| 1-deoxy-D-xylulose 5-phosphate reductoisomerase                         | P45568 | <i>Escherichia coli</i> (strain K12) | Cytoplasm |
| Aspartate ammonia-lyase                                                 | Q8XDS0 | <i>Escherichia coli</i> O157:H7      | Cytoplasm |

|                                                                                                   |        |                                                                                                           |                 |
|---------------------------------------------------------------------------------------------------|--------|-----------------------------------------------------------------------------------------------------------|-----------------|
| Trehalose synthase                                                                                | Q1ARU5 | <i>Rubrobacter xylanophilus</i><br>(strain DSM 9941 / NBRC<br>16129 / PRD-1)                              | Cytoplasm       |
| Cytochrome bc1 complex Rieske iron-<br>sulfur subunit                                             | Q9X807 | <i>Streptomyces coelicolor</i> (strain<br>ATCC BAA-471 / A3(2) /<br>M145)                                 | Plasma membrane |
| Fructose-1,6-bisphosphatase class 1 2                                                             | B2JVN8 | <i>Paraburkholderia phymatum</i><br>(strain DSM 17167 / CIP<br>108236 / LMG 21445 /<br>STM815)            | Cytoplasm       |
| 1,4-alpha-glucan branching enzyme GlgB                                                            | A7FNX5 | <i>Yersinia pseudotuberculosis</i><br>serotype O:1b (strain IP 31758)                                     | Cytoplasm       |
| ATP synthase subunit a                                                                            | Q4FPE9 | <i>Pelagibacter ubique</i> (strain<br>HTCC1062)                                                           | Plasma membrane |
| Glycogen synthase                                                                                 | B1I4F5 | <i>Desulforudis audaxviator</i><br>(strain MP104C)                                                        | Cytoplasm       |
| Lipoamide acyltransferase component of<br>branched-chain alpha-keto acid<br>dehydrogenase complex | P09062 | <i>Pseudomonas putida</i>                                                                                 | Cytoplasm       |
| Dihydroorotate dehydrogenase (quinone)                                                            | A5CS38 | <i>Clavibacter michiganensis</i><br>subsp. <i>michiganensis</i> (strain<br>NCPPB 382)                     | Plasma membrane |
| Enolase                                                                                           | Q98Q50 | <i>Mycoplasma pneumoniae</i><br>(strain UAB CTIP)                                                         | Extracellular   |
| <hr/>                                                                                             |        |                                                                                                           |                 |
| NAD kinase                                                                                        | Q39JD3 | <i>Burkholderia lata</i> (strain ATCC<br>17760 / DSM 23089 / LMG<br>22485 / NCIMB 9086 / R18194<br>/ 383) | Cytoplasm       |
| <b><u>DNA metabolism</u></b>                                                                      |        |                                                                                                           |                 |
| UvrABC system protein B                                                                           | P0A8F8 | <i>Escherichia coli</i> (strain K12)                                                                      | Cytoplasm       |
| DNA-3-methyladenine glycosylase 2                                                                 | P04395 | <i>Escherichia coli</i> (strain K12)                                                                      | Cytoplasm       |
| UvrABC system protein A                                                                           | P0A698 | <i>Escherichia coli</i> (strain K12)                                                                      | Cytoplasm       |
| Probable endonuclease 4                                                                           | P75457 | <i>Mycoplasma pneumoniae</i><br>(strain ATCC 29342 / M129)                                                | Cytoplasm       |

|                                                      |        |                                                                                                      |           |
|------------------------------------------------------|--------|------------------------------------------------------------------------------------------------------|-----------|
| UvrABC system protein C                              | Q5P080 | <i>Aromatoleum aromaticum</i><br>(strain EbN1)                                                       | Cytoplasm |
| DNA recombination protein RmuC                       | P0AG71 | <i>Escherichia coli</i> (strain K12)                                                                 | Unknown   |
| Prophage integrase IntA                              | P32053 | <i>Escherichia coli</i> (strain K12)                                                                 | Unknown   |
| Holliday junction ATP-dependent DNA<br>helicase RuvA | P75243 | <i>Mycoplasma pneumoniae</i><br>(strain ATCC 29342 / M129)                                           | Cytoplasm |
| Tyrosine recombinase XerD                            | Q88MV0 | <i>Pseudomonas putida</i> (strain<br>ATCC 47054 / DSM 6125 /<br>CFBP 8728 / NCIMB 11950 /<br>KT2440) | Cytoplasm |

**Cell wall organization and structural  
maintenance**

|                                                   |        |                                      |                   |
|---------------------------------------------------|--------|--------------------------------------|-------------------|
| Soluble lytic murein transglycosylase             | P0AGC3 | <i>Escherichia coli</i> (strain K12) | Periplasmic space |
| D-alanyl-D-alanine carboxypeptidase<br>DacB       | P24228 | <i>Escherichia coli</i> (strain K12) | Periplasmic space |
| Cell shape-determining protein MreB               | P0A9X4 | <i>Escherichia coli</i> (strain K12) | Plasma membrane   |
| Probable L,D-transpeptidase ErfK/SrfK             | P39176 | <i>Escherichia coli</i> (strain K12) | Periplasmic space |
| Cell shape-determining protein MreC               | P16926 | <i>Escherichia coli</i> (strain K12) | Plasma membrane   |
| Membrane-bound lytic murein<br>transglycosylase A | P0A935 | <i>Escherichia coli</i> (strain K12) | Plasma membrane   |

---

|                                                                               |        |                                                                                                     |                   |
|-------------------------------------------------------------------------------|--------|-----------------------------------------------------------------------------------------------------|-------------------|
| Murein tetrapeptide carboxypeptidase                                          | P76008 | <i>Escherichia coli</i> (strain K12)                                                                | Cytoplasm         |
| Murein DD-endopeptidase MepH                                                  | P76190 | <i>Escherichia coli</i> (strain K12)                                                                | Periplasmic space |
| Bifunctional protein GlmU                                                     | Q0BSR5 | <i>Granulibacter bethesdensis</i><br>(strain ATCC BAA-1260 /<br>CGDNIH1)                            | Cytoplasm         |
| Sensor protein LytS                                                           | Q5HLG3 | <i>Staphylococcus epidermidis</i><br>(strain ATCC 35984 / RP62A)                                    | Plasma membrane   |
| UDP-N-acetylglucosamine 1-<br>carboxyvinyltransferase                         | A8GW63 | <i>Rickettsia bellii</i> (strain OSU<br>85-389)                                                     | Cytoplasm         |
| Undecaprenyl-phosphate alpha-N-<br>acetylglucosaminyl 1-phosphate transferase | Q9X1N5 | <i>Thermotoga maritima</i> (strain<br>ATCC 43589 / DSM 3109 /<br>JCM 10099 / NBRC 100826 /<br>MSB8) | Plasma membrane   |

|                                               |        |                                                            |                 |
|-----------------------------------------------|--------|------------------------------------------------------------|-----------------|
| D-alanine--D-alanine ligase                   | Q3IFY2 | <i>Pseudoalteromonas translucida</i><br>(strain TAC 125)   | Cytoplasm       |
| Inner membrane protein YdcZ                   | P76111 | <i>Escherichia coli</i> (strain K12)                       | Plasma membrane |
| Flagellar basal-body rod protein FlgG         | P24500 | <i>Bacillus subtilis</i> (strain 168)                      | Unknown         |
| Flagellin                                     | Q06968 | <i>Salmonella berta</i>                                    | Extracellular   |
| Cell division protein FtsZ                    | P0A9A6 | <i>Escherichia coli</i> (strain K12)                       | Plasma membrane |
| Probable septum site-determining protein MinC | Q63RS4 | <i>Burkholderia pseudomallei</i><br>(strain K96243)        | Cytoplasm       |
| Cytadherence high molecular weight protein 3  | Q50360 | <i>Mycoplasma pneumoniae</i><br>(strain ATCC 29342 / M129) | cytoplasm       |

### Protein Biosynthesis and Metabolism

|                           |        |                                                                                                                     |                      |
|---------------------------|--------|---------------------------------------------------------------------------------------------------------------------|----------------------|
| 50S ribosomal protein L3  | P60438 | <i>Escherichia coli</i> (strain K12)                                                                                | Ribosome             |
| 30S ribosomal protein S17 | P0AG63 | <i>Escherichia coli</i> (strain K12)                                                                                | Cytoplasm            |
| 50S ribosomal protein L4  | P75579 | <i>Mycoplasma pneumoniae</i><br>(strain ATCC 29342 / M129)                                                          | Ribosome             |
| 30S ribosomal protein S2  | A1TN69 | <i>Acidovorax citrulli</i> (strain AAC00-1)                                                                         | Cytoplasm            |
| 50S ribosomal protein L14 | A9BH95 | <i>Petrotoga mobilis</i> (strain DSM 10674 / SJ95)                                                                  | Ribosome             |
| 30S ribosomal protein S11 | A3N380 | <i>Actinobacillus pleuropneumoniae</i> serotype 5b<br>(strain L20)                                                  | Ribosome             |
| 30S ribosomal protein S5  | Q5P315 | <i>Aromatoleum aromaticum</i><br>(strain EbN1)                                                                      | Small ribosomal unit |
| 30S ribosomal protein S6  | Q3JEJ6 | <i>Nitrosococcus oceani</i> (strain ATCC 19707 / BCRC 17464 / JCM 30415 / NCIMB 11848 / C-107)                      | Ribosome             |
| 30S ribosomal protein S3  | Q8R7W0 | <i>Caldanaerobacter subterraneus</i> subsp. <i>tengcongensis</i> (strain DSM 15242 / JCM 11007 / NBRC 100824 / MB4) | Ribosome             |
| 50S ribosomal protein L28 | Q5PAC9 | <i>Anaplasma marginale</i> (strain St. Maries)                                                                      | Ribosome             |

|                                                 |        |                                                                                                                    |                 |
|-------------------------------------------------|--------|--------------------------------------------------------------------------------------------------------------------|-----------------|
| 50S ribosomal protein L24                       | A9KJI3 | <i>Lachnoclostridium phytofermentans</i> (strain ATCC 700394 / DSM 18823 / ISDg)                                   | Ribosome        |
| Chromophore lyase CpcS/CpeS 2                   | Q10XT3 | <i>Trichodesmium erythraeum</i> (strain IMS101)                                                                    | Cytoplasm       |
| Aspartate aminotransferase                      | P00509 | <i>Escherichia coli</i> (strain K12)                                                                               | Cytoplasm       |
| D-amino acid dehydrogenase                      | P0A6J5 | <i>Escherichia coli</i> (strain K12)                                                                               | Plasma membrane |
| Bifunctional protein TrpGD                      | P00904 | <i>Escherichia coli</i> (strain K12)                                                                               | Cytoplasm       |
| Elongation factor P--(R)-beta-lysine ligase     | B7LC16 | <i>Escherichia coli</i> (strain K12)                                                                               | Cytoplasm       |
| 4-aminobutyrate aminotransferase PuuE           | P50457 | <i>Escherichia coli</i> (strain K12)                                                                               | Cytoplasm       |
| Acetolactate synthase isozyme 1 large subunit   | P08142 | <i>Escherichia coli</i> (strain K12)                                                                               | Cytoplasm       |
| Cystathionine gamma-synthase                    | P00935 | <i>Escherichia coli</i> (strain K12)                                                                               | Cytoplasm       |
| Glutamate synthase [NADPH] large chain          | P09831 | <i>Escherichia coli</i> (strain K12)                                                                               | Cytoplasm       |
| Glutamate decarboxylase beta                    | P69910 | <i>Escherichia coli</i> (strain K12)                                                                               | Cytoplasm       |
| Ornithine carbamoyltransferase                  | A7ZVD3 | <i>Escherichia coli</i> O157:H7                                                                                    | Cytoplasm       |
| Aspartate aminotransferase                      | Q56114 | <i>Salmonella typhi</i>                                                                                            | Cytoplasm       |
| GMP synthase [glutamine-hydrolyzing]            | A3MZV8 | <i>Actinobacillus pleuropneumoniae</i> serotype 5b (strain L20)                                                    | Cytoplasm       |
| Chorismate synthase                             | Q1QQ46 | <i>Nitrobacter hamburgensis</i> (strain DSM 10229 / NCIMB 13809 / X14)                                             | Cytoplasm       |
| 3-dehydroquinate dehydratase                    | B4RCS3 | <i>Phenylobacterium zucineum</i> (strain HLK1)                                                                     | Cytoplasm       |
| Diaminopimelate epimerase                       | A1SAP5 | <i>Shewanella amazonensis</i> (strain ATCC BAA-1098 / SB2B)                                                        | Cytoplasm       |
| Arginine biosynthesis bifunctional protein ArgJ | Q81M96 | <i>Bacillus anthracis</i>                                                                                          | Cytoplasm       |
| 4-hydroxy-tetrahydrodipicolinate reductase      | A9HE99 | <i>Gluconacetobacter diazotrophicus</i> (strain ATCC 49037 / DSM 5601 / CCUG 37298 / CIP 103539 / LMG 7603 / PAI5) | Cytoplasm       |
| Tryptophan synthase beta chain                  | Q13EQ2 | <i>Rhodopseudomonas palustris</i> (strain BisB5)                                                                   | Cytoplasm       |
| Acetolactate synthase large subunit IlvB1       | P9WG41 | <i>Mycobacterium tuberculosis</i> (strain ATCC 25618 / H37Rv)                                                      | Cytoplasm       |

|                                                   |        |                                                                                                                |                 |
|---------------------------------------------------|--------|----------------------------------------------------------------------------------------------------------------|-----------------|
| Glycine--tRNA ligase beta subunit                 | A4J7C9 | <i>Desulfotomaculum reducens</i><br>(strain MI-1)                                                              | Cytoplasm       |
| o-succinylbenzoate synthase                       | Q838J7 | <i>Enterococcus faecalis</i> (strain<br>ATCC 700802 / V583)                                                    | Cytoplasm       |
| Ketol-acid reductoisomerase (NADP(+))             | Q17X66 | <i>Helicobacter acinonychis</i><br>(strain Sheeba)                                                             | Cytoplasm       |
| Glycine cleavage system H protein                 | A3QHI1 | <i>Shewanella loihica</i> (strain<br>ATCC BAA-1088 / PV-4)                                                     | Cytoplasm       |
| Cysteine synthase A                               | P0ABK6 | <i>Escherichia coli</i> O157:H7                                                                                | Cytoplasm       |
| Diaminopimelate decarboxylase                     | Q8K9C4 | <i>Buchnera aphidicola</i> subsp.<br><i>Schizaphis graminum</i> (strain<br>Sg)                                 | Cytoplasm       |
| 3-phosphoshikimate 1-<br>carboxyvinyltransferase  | B2U886 | <i>Ralstonia pickettii</i> (strain 12J)                                                                        | Cytoplasm       |
| Histidinol-phosphate aminotransferase             | B9KDN6 | <i>Campylobacter lari</i> (strain<br>RM2100 / D67 / ATCC BAA-<br>1060)                                         | Cytoplasm       |
| Pyridoxal 5'-phosphate synthase subunit<br>PdxT   | Q9KGN5 | <i>Alkalihalobacillus halodurans</i><br>(strain ATCC BAA-125 / DSM<br>18197 / FERM 7344 / JCM<br>9153 / C-125) | Cytoplasm       |
| Kynurenine formamidase                            | Q2T0N2 | <i>Burkholderia thailandensis</i><br>(strain ATCC 700388 / DSM<br>13276 / CIP 106301 / E264)                   | Cytoplasm       |
| Cytosol non-specific dipeptidase                  | P15288 | <i>Escherichia coli</i> (strain K12)                                                                           | Cytoplasm       |
| Dipeptidyl carboxypeptidase                       | P24171 | <i>Escherichia coli</i> (strain K12)                                                                           | Cytoplasm       |
| ATP-dependent Clp protease proteolytic<br>subunit | Q928C4 | <i>Listeria innocua</i> serovar 6a<br>(strain ATCC BAA-680 / CLIP<br>11262)                                    | Cytoplasm       |
| Protease HtpX homolog                             | B4S7I8 | <i>rosthochloris aestuarii</i> (strain<br>DSM 271 / SK 413)                                                    | Plasma membrane |
| Carbamoyl dehydratase HypE                        | P24193 | <i>Escherichia coli</i> (strain K12)                                                                           | Cytoplasm       |
| Cysteine--tRNA ligase                             | P75423 | <i>Mycoplasma pneumoniae</i><br>(strain ATCC 29342 / M129)                                                     | Cytoplasm       |
| Leucine--tRNA ligase                              | P75398 | <i>Mycoplasma pneumoniae</i><br>(strain ATCC 29342 / M129)                                                     | Cytoplasm       |
| Serine--tRNA ligase                               | P75107 | <i>Mycoplasma pneumoniae</i><br>(strain ATCC 29342 / M129)                                                     | Cytoplasm       |



|                                                  |        |                                                                                                                                                                                                                            |           |
|--------------------------------------------------|--------|----------------------------------------------------------------------------------------------------------------------------------------------------------------------------------------------------------------------------|-----------|
| Valine--tRNA ligase                              | P75304 | <i>Mycoplasma pneumoniae</i><br>(strain ATCC 29342 / M129)                                                                                                                                                                 | Cytoplasm |
| Glutamyl-tRNA(Gln) amidotransferase<br>subunit A | P75534 | <i>Mycoplasma pneumoniae</i><br>(strain ATCC 29342 / M129)                                                                                                                                                                 | Cytoplasm |
| Phenylalanine--tRNA ligase alpha subunit         | Q5GTJ5 | <i>Wolbachia sp. subsp. Brugia</i><br><i>malayi</i> (strain TRS)                                                                                                                                                           | Cytoplasm |
| Valine--tRNA ligase                              | P36420 | <i>Lactobacillus casei</i>                                                                                                                                                                                                 | Cytoplasm |
| Proline--tRNA ligase                             | B8CW65 | <i>Halothermothrix orenii</i> (strain<br>H 168 / OCM 544 / DSM 9562)                                                                                                                                                       | Cytoplasm |
| Alanine--tRNA ligase                             | Q03YQ2 | <i>Leuconostoc mesenteroides</i><br><i>subsp. mesenteroides</i> (strain<br>ATCC 8293 / DSM 20343 /<br>BCRC 11652 / CCM 1803 /<br>JCM 6124 / NCDO 523 /<br>NBRC 100496 / NCIMB 8023 /<br>NCTC 12954 / NRRL B-1118 /<br>37Y) | Cytoplasm |
| Threonine--tRNA ligase                           | B0TT20 | <i>Shewanella halifaxensis</i> (strain<br>HAW-EB4)                                                                                                                                                                         | Cytoplasm |
| Peptide chain release factor 1                   | B8HB03 | <i>Pseudarthrobacter</i><br><i>chlorophenolicus</i> (strain ATCC<br>700700 / DSM 12829 / CIP<br>107037 / JCM 12360 / KCTC<br>9906 / NCIMB 13794 / A6)                                                                      | Cytoplasm |

#### **Regulation Factor and RNA Processing**

|                                                            |        |                                      |                 |
|------------------------------------------------------------|--------|--------------------------------------|-----------------|
| MultifunctionalCCA protein                                 | P06961 | <i>Escherichia coli</i> (strain K12) | Cytoplasm       |
| RibosomalRNA small subunit<br>methyltransferase D          | P0ADX9 | <i>Escherichia coli</i> (strain K12) | Cytoplasm       |
| Ribonuclease 3                                             | P0A7Y0 | <i>Escherichia coli</i> (strain K12) | Cytoplasm       |
| tRNA threonylcarbamoyladenosine<br>dehydratase             | Q46927 | <i>Escherichia coli</i> (strain K12) | Plasma membrane |
| tRNA-2-methylthio-N(6)-<br>dimethylallyladenosine synthase | P0AEI1 | <i>Escherichia coli</i> (strain K12) | Cytoplasm       |

|                                                     |        |                                                                                                                 |                 |
|-----------------------------------------------------|--------|-----------------------------------------------------------------------------------------------------------------|-----------------|
| Putative pre-16S rRNA nuclease                      | P57114 | <i>Mycoplasma pneumoniae</i><br>(strain ATCC 29342 / M129)                                                      | Cytoplasm       |
| Ribonuclease Y                                      | P75506 | <i>Mycoplasma pneumoniae</i><br>(strain ATCC 29342 / M129)                                                      | Plasma membrane |
| tRNA-specific 2-thiouridylase MnmA                  | A712L9 | <i>Campylobacter hominis</i> (strain<br>ATCC BAA-381 / LMG 19568<br>/ NCTC 13146 / CH001A)                      | Cytoplasm       |
| Ribosomal RNA small subunit<br>methyltransferase A  | A4YJT3 | <i>Bradyrhizobium sp.</i> (strain<br>BTai1 / ATCC BAA-1182)                                                     | Cytoplasm       |
| Ribosomal protein S12<br>methylthiotransferase RimO | Q7VKK2 | <i>Haemophilus ducreyi</i> (strain<br>35000HP / ATCC 700724)                                                    | Cytoplasm       |
| Probable RNA 2'-phosphotransferase                  | Q395F2 | <i>Burkholderia lata</i> (strain ATCC<br>17760 / DSM 23089 / LMG<br>22485 / NCIMB 9086 / R18194<br>/ 383)       | Cytoplasm       |
| tRNA uridine (34) hydroxylase                       | Q7UFS5 | <i>Rhodopirellula baltica</i> (strain<br>DSM 10527 / NCIMB 13988 /<br>SH1)                                      | Cytoplasm       |
| tRNA modification GTPase MnmE                       | A5VA82 | <i>Rhizorhabdus wittichii</i> (strain<br>DSM 6014 / CCUG 31198 /<br>JCM 15750 / NBRC 105917 /<br>EY 4224 / RW1) | Cytoplasm       |
| Elongation factor Ts                                | A8MHH0 | <i>Alkaliphilus oremlandii</i> (strain<br>OhILAs)                                                               | Cytoplasm       |
| Ribosomal RNA large subunit<br>methyltransferase H  | Q2NUV2 | <i>Sodalis glossinidius</i> (strain<br>morsitans)                                                               | Cytoplasm       |
| Ribonuclease Z                                      | A6LU82 | <i>Clostridium beijerinckii</i> (strain<br>ATCC 51743 / NCIMB 8052)                                             | Cytoplasm       |
| Elongation factor Tu                                | A7HBL7 | <i>Anaeromyxobacter sp.</i> (strain<br>Fw109-5)                                                                 | Cytoplasm       |
| GTPase Der                                          | A1SU43 | <i>Psychromonas ingrahamii</i><br>(strain 37)                                                                   | Cytoplasm       |
| Elongation factor G 2                               | Q3IJW9 | <i>Pseudoalteromonas translucida</i><br>(strain TAC 125)                                                        | Cytoplasm       |

### Regulation of transcription

|                                                 |        |                                                         |           |
|-------------------------------------------------|--------|---------------------------------------------------------|-----------|
| Uxu operon transcriptional regulator            | P39161 | <i>Escherichia coli</i> (strain K12)                    | Cytoplasm |
| HTH-type transcriptional regulator ZntR         | P0ACS5 | <i>Escherichia coli</i> (strain K12)                    | Cytoplasm |
| Psp operon transcriptional activator            | P37344 | <i>Escherichia coli</i> (strain K12)                    | Cytoplasm |
| Propionate catabolism operon regulatory protein | P77743 | <i>Escherichia coli</i> (strain K12)                    | Cytoplasm |
| Sugar fermentation stimulation protein B        | P0ACH1 | <i>Escherichia coli</i> (strain K12)                    | Unknown   |
| DNA polymerase I                                | P00582 | <i>Escherichia coli</i> (strain K12)                    | Cytoplasm |
| OriC-binding nucleoid-associated protein        | P64467 | <i>Escherichia coli</i> (strain K12)                    | Cytoplasm |
| DNA-directed RNA polymerase subunit alpha       | Q50295 | <i>Mycoplasma pneumoniae</i> (strain ATCC 29342 / M129) | Cytoplasm |
| Biofilm growth-associated repressor             | Q8UAA8 | <i>Agrobacterium fabrum</i> (strain C58 / ATCC 33970)   | Cytoplasm |
| Transcriptional regulatory protein PrrA         | Q50136 | <i>Mycobacterium leprae</i> (strain TN)                 | Cytoplasm |

### DNA replication

|                                                    |        |                                                                                            |           |
|----------------------------------------------------|--------|--------------------------------------------------------------------------------------------|-----------|
| Beta sliding clamp                                 | P0A988 | <i>Escherichia coli</i> (strain K12)                                                       | Cytoplasm |
| Anaerobic ribonucleoside-triphosphate reductase    | P28903 | <i>Escherichia coli</i> (strain K12)                                                       | Cytoplasm |
| Ribonucleoside-diphosphate reductase subunit alpha | P78027 | <i>Mycoplasma pneumoniae</i> (strain ATCC 29342 / M129)                                    | Cytoplasm |
| LexA repressor                                     | Q33927 | <i>Thermotoga maritima</i> (strain ATCC 43589 / DSM 3109 / JCM 10099 / NBRC 100826 / MSB8) | Cytoplasm |
| Flap endonuclease Xni                              | A1S8B8 | <i>Shewanella amazonensis</i> (strain ATCC BAA-1098 / SB2B)                                | Cytoplasm |

|                                                             |        |                                                                                                                                                                              |                     |
|-------------------------------------------------------------|--------|------------------------------------------------------------------------------------------------------------------------------------------------------------------------------|---------------------|
| Chromosomal replication initiator protein<br>Dna A          | Q1MSG8 | <i>Lawsonia intracellularis</i> (strain<br>PHE/MN1-00)                                                                                                                       | Cytoplasm           |
| <b><u>Cell signaling</u></b>                                |        |                                                                                                                                                                              |                     |
| Signal recognition particle protein                         | P0AGD7 | <i>Escherichia coli</i> (strain K12)                                                                                                                                         | Ribosome            |
| Bacteriophage adsorption protein A                          | P31600 | <i>Escherichia coli</i> (strain K12)                                                                                                                                         | Cell outer membrane |
| Sensor protein EvgS                                         | P30855 | <i>Escherichia coli</i> (strain K12)                                                                                                                                         | Plasma membrane     |
| Sensor histidine kinase EnvZ                                | P0AEJ4 | <i>Escherichia coli</i> (strain K12)                                                                                                                                         | Plasma membrane     |
| <b><u>Ion assimilation</u></b>                              |        |                                                                                                                                                                              |                     |
| Ferric iron reductase protein FhuF                          | P39405 | <i>Escherichia coli</i> (strain K12)                                                                                                                                         | Plasma membrane     |
| Periplasmic nitrate reductase                               | P33937 | <i>Escherichia coli</i> (strain K12)                                                                                                                                         | Periplasmic space   |
| Anaerobic nitric oxide reductase<br>flavo-hemoglobin        | A0KEJ1 | <i>Aeromonas hydrophila</i> subsp.<br><i>hydrophila</i> (strain ATCC 7966<br>/ DSM 30187 / BCRC 13018 /<br>CCUG 14551 / JCM 1027 /<br>KCTC 2358 / NCIMB 9240 /<br>NCTC 8049) | Cytoplasm           |
| <b><u>Transferase</u></b>                                   |        |                                                                                                                                                                              |                     |
| 3-oxoadipyl-CoA/3-oxo-5,6-<br>dehydrosuberyl-CoA thiolase   | P0C7L2 | <i>Escherichia coli</i> (strain K12)                                                                                                                                         | Cytoplasm           |
| Trehalose-6-phosphate synthase                              | P31677 | <i>Escherichia coli</i> (strain K12)                                                                                                                                         | Cytoplasm           |
| Propionyl-CoA:succinate CoA transferase                     | P52043 | <i>Escherichia coli</i> (strain K12)                                                                                                                                         | Cytoplasm           |
| Putative phosphotransferase enzyme IIB<br>component MPN_268 | P75507 | <i>Mycoplasm pneumoniae</i><br>(strain ATCC 29342 / M129)                                                                                                                    | Plasma membrane     |

|                                             |        |                                                                         |           |
|---------------------------------------------|--------|-------------------------------------------------------------------------|-----------|
| Ubiquinone biosynthesis O-methyltransferase | A8LQ43 | <i>Dinoroseobacter shibae</i> (strain DSM 16493 / NCIMB 14021 / DFL 12) | Cytoplasm |
| tRNA-cytidine (32) 2-sulfurtransferase      | A4G9W3 | <i>Herminiimonas arsenicoxydans</i>                                     | Cytoplasm |
| Probable transaldolase                      | A5GBY8 | <i>Geotalea uraniiireducens</i> (strain Rf4)                            | Cytoplasm |

### Nucleotide metabolism

|                                                            |        |                                                                                                                                   |           |
|------------------------------------------------------------|--------|-----------------------------------------------------------------------------------------------------------------------------------|-----------|
| Nucleoside diphosphate kinase                              | A8AD67 | <i>Citrobacter koseri</i> (strain ATCC BAA-895 / CDC 4225-83 / SGSC4696)                                                          | Cytoplasm |
| Probable dihydroorotate dehydrogenase A (fumarate)         | P59626 | <i>Enterococcus faecalis</i> (strain ATCC 700802 / V583)                                                                          | Cytoplasm |
| Uridine phosphorylase                                      | O08444 | <i>Klebsiella aerogenes</i>                                                                                                       | Cytoplasm |
| Thymidylate kinase                                         | C4KZW9 | <i>Exiguobacterium</i> sp. (strain ATCC BAA-1283 / AT1b)                                                                          | Cytoplasm |
| Thymidylate synthase                                       | A7MXJ9 | <i>Vibrio campbellii</i> (strain ATCC BAA-1116 / BB120)                                                                           | Cytoplasm |
| Adenosine deaminase                                        | P22333 | <i>Escherichia coli</i> (strain K12)                                                                                              | Cytoplasm |
|                                                            |        | <i>Deinococcus radiodurans</i> (strain ATCC 13939 / DSM 20539 / JCM 16871 / LMG 4051 / NBRC 15346 / NCIMB 9279 / R1 / VKM B-1422) | Cytoplasm |
| Allantoinase                                               | Q9RV76 | <i>Shigella dysenteriae</i> serotype 1 (strain Sd197)                                                                             | Unknown   |
| Putative carbamate hydrolase RutD                          | Q32HQ2 | <i>Mycoplasma penetrans</i> (strain HF-2)                                                                                         | Cytoplasm |
| Dihydroorotate dehydrogenase B (NAD(+))                    | Q8EUY2 | <i>Coprothermobacter proteolyticus</i> (strain ATCC 35245 / DSM 5265 / OCM 4 / BT)                                                | Cytoplasm |
| Probable glycine dehydrogenase (decarboxylating) subunit 1 | B5Y9D4 |                                                                                                                                   |           |

### Transmembrane transporters

|              |        |                                      |                   |
|--------------|--------|--------------------------------------|-------------------|
| Protein TonB | P02929 | <i>Escherichia coli</i> (strain K12) | Periplasmic space |
|--------------|--------|--------------------------------------|-------------------|

|                                                               |        |                                                                                                                                                                |                     |
|---------------------------------------------------------------|--------|----------------------------------------------------------------------------------------------------------------------------------------------------------------|---------------------|
| Sodium/pantothenate symporter                                 | P16256 | <i>Escherichia coli</i> (strain K12)                                                                                                                           | Plasma membrane     |
| Proline-specific permease ProY                                | P0AAE2 | <i>Escherichia coli</i> (strain K12)                                                                                                                           | Plasma membrane     |
| D-allose import ATP-binding protein AlsA                      | P32721 | <i>Escherichia coli</i> (strain K12)                                                                                                                           | Plasma membrane     |
| Glutamate/aspartate import ATP-binding protein GltL           | P0AAG3 | <i>Escherichia coli</i> (strain K12)                                                                                                                           | Plasma membrane     |
| L-cystine-binding protein TcyJ                                | P0AEM9 | <i>Escherichia coli</i> (strain K12)                                                                                                                           | Plasma membrane     |
| Inner membrane metabolite transport protein YdjE              | P38055 | <i>Escherichia coli</i> (strain K12)                                                                                                                           | Plasma membrane     |
| Outer membrane porin C                                        | P06996 | <i>Escherichia coli</i> (strain K12)                                                                                                                           | Cell outer membrane |
| Miniconductance mechanosensitive channel YbdG                 | P0AAT4 | <i>Escherichia coli</i> (strain K12)                                                                                                                           | Plasma membrane     |
| Polyamine export protein                                      | P0AE45 | <i>Escherichia coli</i> (strain K12)                                                                                                                           | Cell outer membrane |
| Putative nucleoside permease NupX                             | P33021 | <i>Escherichia coli</i> (strain K12)                                                                                                                           | Plasma membrane     |
| AI-2 transport protein TqsA                                   | P0AFS5 | <i>Escherichia coli</i> (strain K12)                                                                                                                           | Cell inner membrane |
| Multiphosphoryl transfer protein                              | P32670 | <i>Escherichia coli</i> (strain K12)                                                                                                                           | Cytoplasm           |
| Flagellar biosynthetic protein FlhB                           | P76299 | <i>Escherichia coli</i> (strain K12)                                                                                                                           | Plasma membrane     |
| p-hydroxybenzoic acid efflux pump subunit AaeA                | P46481 | <i>Escherichia coli</i> (strain K12)                                                                                                                           | Plasma membrane     |
| Nitrate/nitrite transporter NarU                              | P37758 | <i>Escherichia coli</i> (strain K12)                                                                                                                           | Plasma membrane     |
| Phosphate import ATP-binding protein PstB                     | P75186 | <i>Mycoplasma pneumoniae</i> (strain ATCC 29342 / M129)                                                                                                        | Plasma membrane     |
|                                                               |        | <i>Fusobacterium nucleatum</i> subsp. <i>nucleatum</i> (strain ATCC 25586 / DSM 15643 / BCRC 10681 / CIP 101130 / JCM 8532 / KCTC 2640 / LMG 13131 / VPI 4355) |                     |
| Methionine import ATP-binding protein MetN                    | Q8RFN2 | <i>Neisseria meningitidis</i> serogroup B (strain MC58)                                                                                                        | Plasma membrane     |
| Probable TonB-dependent receptor NMB0964                      | Q9JZN9 | <i>Bacillus subtilis</i> (strain 168)                                                                                                                          | Plasma membrane     |
| Probable membrane transporter protein YdhB                    | O05493 | <i>Staphylococcus aureus</i> (strain N315)                                                                                                                     | Plasma membrane     |
| Putative multidrug export ATP-binding/permease protein SA1683 | Q7A4T3 | <i>Alkalihalobacillus halodurans</i> (strain ATCC BAA-125 / DSM 18197 / FERM 7344 / JCM 9153 / C-125)                                                          | Cytoplasm           |
| Protein translocase subunit SecA                              | Q9K6W8 | <i>Pseudomonas aeruginosa</i> (strain ATCC 15692 / DSM                                                                                                         | Periplasmic space   |
| C4-dicarboxylate-binding periplasmic protein DctP             | Q9HU18 |                                                                                                                                                                |                     |

22644 / CIP 104116 / JCM  
14847 / LMG 12228 / 1C / PRS  
101 / PAO1)

### Isoprene biosynthesis

|                                                                      |        |                                                                                                                 |           |
|----------------------------------------------------------------------|--------|-----------------------------------------------------------------------------------------------------------------|-----------|
| 4-hydroxy-3-methylbut-2-en-1-yl<br>diphosphate synthase (flavodoxin) | Q6G104 | <i>Bartonella quintana</i> (strain<br>Toulouse)                                                                 | Cytoplasm |
| Bifunctional enzyme IspD/IspF                                        | A5V2U9 | <i>Rhizorhabdus wittichii</i> (strain<br>DSM 6014 / CCUG 31198 /<br>JCM 15750 / NBRC 105917 /<br>EY 4224 / RW1) | Cytoplasm |

### Light dependent process

|                                                              |        |                                                                |           |
|--------------------------------------------------------------|--------|----------------------------------------------------------------|-----------|
| Light-independent protochlorophyllide<br>reductase subunit B | Q132N3 | <i>Rhodopseudomonas palustris</i><br>(strain BisB5)            | Cytoplasm |
| Protein Thf1                                                 | Q8YZ41 | <i>Nostoc sp.</i> (strain PCC 7120 /<br>SAG 25.82 / UTEX 2576) | Cytoplasm |

### Pathogenesis

|                                                                 |        |                                      |               |
|-----------------------------------------------------------------|--------|--------------------------------------|---------------|
| Cytolysin RtxA                                                  | A1YKW7 | <i>Kingella kingae</i>               | Extracellular |
| Putative colanic acid biosynthesis glycosyl<br>transferase WcaI | P32057 | <i>Escherichia coli</i> (strain K12) | Cytoplasm     |
| Lipopolysaccharide 1,2-N-<br>acetylglucosamintransferase        | P27242 | <i>Escherichia coli</i> (strain K12) | Cytoplasm     |

### Unknown

|                                                                         |        |                                      |                 |
|-------------------------------------------------------------------------|--------|--------------------------------------|-----------------|
| Oxidoreductase UcpA                                                     | P37440 | <i>Escherichia coli</i> (strain K12) | Cytoplasm       |
| Putative inactive recombination-promoting<br>nuclease-like protein YjiQ | P0DP22 | <i>Escherichia coli</i> (strain K12) | Cytoplasm       |
| Lipoprotein YfjS                                                        | O52982 | <i>Escherichia coli</i> (strain K12) | Plasma membrane |

|                                                     |        |                                                                                                 |                 |
|-----------------------------------------------------|--------|-------------------------------------------------------------------------------------------------|-----------------|
| Protein YhfA                                        | P0ADX1 | <i>Escherichia coli</i> (strain K12)                                                            | Cytoplasm       |
| Hydrogenase-4 component I                           | P77668 | <i>Escherichia coli</i> (strain K12)                                                            | Plasma membrane |
| Probable ATP-dependent helicase I                   | P30015 | <i>Escherichia coli</i> (strain K12)                                                            | Cytoplasm       |
| Hydrogenase-4 component J                           | P77453 | <i>Escherichia coli</i> (strain K12)                                                            | Plasma membrane |
| Insertion element IS150 protein InsJ                | P19768 | <i>Escherichia coli</i> (strain K12)                                                            | Cytoplasm       |
| Protein YrdA                                        | P0A9W9 | <i>Escherichia coli</i> (strain K12)                                                            | Cytoplasm       |
| Probable cyclic di-GMP phosphodiesterase PdeI       | P75800 | <i>Escherichia coli</i> (strain K12)                                                            | Plasma membrane |
| Probable ATP-dependent RNA helicase MG425 homolog   | P75172 | <i>Mycoplasma pneumoniae</i> (strain ATCC 29342 / M129)                                         | Cytoplasm       |
| Putative adhesin P1-like protein MPN_370            | P75411 | <i>Mycoplasma pneumoniae</i> (strain ATCC 29342 / M129)                                         | Extracellular   |
| UPF0134 protein MPN_675                             | P75117 | <i>Mycoplasma pneumoniae</i> (strain ATCC 29342 / M129)                                         | Unknown         |
| Translation initiation factor IF-2                  | C5CDZ4 | <i>Kosmotoga olearia</i> (strain ATCC BAA-1733 / DSM 21960 / TBF 19.5.1)                        | Cytoplasm       |
| NAD(P)H dehydrogenase (quinone)                     | B9M9X5 | <i>Acidovorax ebreus</i> (strain TPSY)                                                          | Unknown         |
| General stress protein 26                           | P80238 | <i>Bacillus subtilis</i> (strain 168)                                                           | Unknown         |
| 7,8-didemethyl-8-hydroxy-5-deazariboflavin synthase | P73191 | <i>Synechocystis</i> sp. (strain PCC 6803 / Kazusa)                                             | Cytoplasm       |
| UPF0102 protein Sama_3355                           | A1SB01 | <i>Shewanella amazonensis</i> (strain ATCC BAA-1098 / SB2B)                                     | Cytoplasm       |
| Oligoribonuclease                                   | Q2L2P5 | <i>Bordetella avium</i> (strain 197N)                                                           | Cytoplasm       |
| UPF0229 protein Meso_0256                           | Q11LR5 | <i>Chelativorans</i> sp. (strain BNC1)                                                          | Cytoplasm       |
| Quinone-reactive Ni/Fe-hydrogenase large chain      | P31883 | <i>Wolinella succinogenes</i> (strain ATCC 29543 / DSM 1740 / LMG 7466 / NCTC 11488 / FDC 602W) | Plasma membrane |
| Lipoprotein LpqB                                    | Q47LZ  | <i>Thermobifida fusca</i> (strain YX)                                                           | Plasma membrane |

---



**Supplementary Table 2 – DMSO group unique proteins identified by ESI-LC-MS/MS**

| Protein Name                                      | ID uniprot | Organism Reference                                                | Cellular Compartment |
|---------------------------------------------------|------------|-------------------------------------------------------------------|----------------------|
| <b><u>Carbohydrate metabolism</u></b>             |            |                                                                   |                      |
| Maltodextrin phosphorylase                        | P00490     | <i>Escherichia coli</i> (strain K12)                              | Cytoplasm            |
| L-fuculokinase                                    | P11553     | <i>Escherichia coli</i> (strain K12)                              | Cytoplasm            |
| Hexitol phosphatase B                             | P77247     | <i>Escherichia coli</i> (strain K12)                              | Cytoplasm            |
| Putative beta-xylosidase                          | P77713     | <i>Escherichia coli</i> (strain K12)                              | Unknown              |
| Lactaldehyde dehydrogenase                        | P25553     | <i>Escherichia coli</i> (strain K12)                              | Cytoplasm            |
| 3-oxo-tetronate kinase                            | Q46889     | <i>Escherichia coli</i> (strain K12)                              | Unknown              |
| dTDP-4-amino-4,6-dideoxygalactose<br>transaminase | P27833     | <i>Escherichia coli</i> (strain K12)                              | Cytoplasm            |
| Sulfoquinovose isomerase                          | P32140     | <i>Escherichia coli</i> (strain K12)                              | Cytoplasm            |
| Putative 1-phosphofructokinase                    | P75038     | <i>Mycoplasma pneumoniae</i><br>(strain ATCC 29342 / M129)        | Plasma membrane      |
| Transaldolase                                     | Q66ET5     | <i>Yersinia pseudotuberculosis</i><br>serotype I (strain IP32953) | Cytoplasm            |
| 5-oxoprolinase subunit A                          | A0JR24     | <i>Arthrobacter sp.</i> (strain FB24)                             | Unknown              |
| <b><u>Cell Redox Homeostasis</u></b>              |            |                                                                   |                      |
| Alkyl hydroperoxide reductase C                   | P0AE08     | <i>Escherichia coli</i> (strain K12)                              | Cytoplasm            |
| Alkyl hydroperoxide reductase<br>subunit F        | P35340     | <i>Escherichia coli</i> (strain K12)                              | Cytoplasm            |
| Probable NADH oxidase                             | P75389     | <i>Mycoplasma pneumoniae</i> (strain<br>ATCC 29342 / M129)        | Cytoplasm            |
| <b><u>Stress and Defense Response</u></b>         |            |                                                                   |                      |

|                                                                |        |                                                                                 |                   |
|----------------------------------------------------------------|--------|---------------------------------------------------------------------------------|-------------------|
| ATP-dependent RNA helicase DeaD                                | P0A9P6 | <i>Escherichia coli</i> (strain K12)                                            | Periplasmic space |
| UDP-4-amino-4-deoxy-L-arabinose--oxoglutarate aminotransferase | P77690 | <i>Escherichia coli</i> (strain K12)                                            | Cytoplasm         |
| Multidrug resistance protein MdtN                              | P32716 | <i>Escherichia coli</i> (strain K12)                                            | Plasma membrane   |
| UPF0194 membrane protein YbhG                                  | P75777 | <i>Escherichia coli</i> (strain K12)                                            | Plasma membrane   |
| Probable multidrug resistance protein EmrK                     | P52599 | <i>Escherichia coli</i> (strain K12)                                            | Plasma membrane   |
| Chaperone protein ClpB                                         | Q88VX7 | <i>Escherichia coli</i> (strain K12)                                            | Cytoplasm         |
| Protein GrpE                                                   | P78017 | <i>Mycoplasma pneumoniae</i> (strain ATCC 29342 / M129)                         | Cytoplasm         |
| Chaperonin GroEL                                               | P78012 | <i>Mycoplasma pneumoniae</i> (strain ATCC 29342 / M129)                         | Cytoplasm         |
| Co-chaperonin GroES                                            | A7ZCV1 | <i>Campylobacter concisus</i> (strain 13826)                                    | Cytoplasm         |
| Chaperone protein DnaK                                         | C4K3I6 | <i>Hamiltonella defensa</i> subsp. <i>Acyrtosiphon pisum</i> (strain 5AT)       | Cytoplasm         |
| Chaperone protein ClpB                                         | Q88VX7 | <i>Lactiplantibacillus plantarum</i> (strain ATCC BAA-793 / NCIMB 8826 / WCFS1) | Cytoplasm         |

### **Energy and Metabolism**

|                                                     |        |                                      |                 |
|-----------------------------------------------------|--------|--------------------------------------|-----------------|
| Pyruvate dehydrogenase E1 component                 | P0AFG8 | <i>Escherichia coli</i> (strain K12) | Cytoplasm       |
| Phosphoglucomutase                                  | P36938 | <i>Escherichia coli</i> (strain K12) | Cytoplasm       |
| Glucose-6-phosphate isomerase                       | P0A6T1 | <i>Escherichia coli</i> (strain K12) | Cytoplasm       |
| Acyl carrier protein                                | P0A6A8 | <i>Escherichia coli</i> (strain K12) | Cytoplasm       |
| Citrate synthase                                    | P0ABH7 | <i>Escherichia coli</i> (strain K12) | Cytoplasm       |
| Cytochrome bo(3) ubiquinol oxidase subunit 1        | P0ABI8 | <i>Escherichia coli</i> (strain K12) | Plasma membrane |
| Phosphoglycerate kinase                             | P0A799 | <i>Escherichia coli</i> (strain K12) | Cytoplasm       |
| Formate hydrogenlyase subunit 7 dehydrogenase C2    | P16433 | <i>Escherichia coli</i> (strain K12) | Cytoplasm       |
| Glutathione-specific gamma-glutamylcyclotransferase | P39163 | <i>Escherichia coli</i> (strain K12) | Cytoplasm       |

|                                                          |        |                                                                                                   |                   |
|----------------------------------------------------------|--------|---------------------------------------------------------------------------------------------------|-------------------|
| NADH-quinone oxidoreductase subunit I                    | P0AFD6 | <i>Escherichia coli</i> (strain K12)                                                              | Plasma membrane   |
| Galactokinase                                            | P0A6T3 | <i>Escherichia coli</i> (strain K12)                                                              | Cytoplasm         |
| Fructose-bisphosphate aldolase                           | P75089 | <i>Mycoplasma pneumoniae</i><br>(strain ATCC 29342 / M129)                                        | Cytoplasm         |
| Enolase                                                  | P75189 | <i>Mycoplasma pneumoniae</i><br>(strain ATCC 29342 / M129)                                        | Cytoplasm         |
| Acetate kinase                                           | P75245 | <i>Mycoplasma pneumoniae</i><br>(strain ATCC 29342 / M129)                                        | Cytoplasm         |
| Phosphoglycerate kinase                                  | A7MJQ4 | <i>Cronobacter sakazakii</i> (strain<br>ATCC BAA-894)                                             | Cytoplasm         |
| Adenylate kinase                                         | A5FZU4 | <i>Acidiphilium cryptum</i> (strain<br>JF-5)                                                      | Cytoplasm         |
| Glyceraldehyde-3-phosphate<br>dehydrogenase              | Q07234 | <i>Buchnera aphidicola</i> subsp.<br><i>Schizaphis graminum</i> (strain<br>Sg)                    | Cytoplasm         |
| Phosphoenolpyruvate synthase                             | P23538 | <i>Escherichia coli</i> (strain K12)                                                              | Cytoplasm         |
| methylglyoxal synthase                                   | P0A731 | <i>Escherichia coli</i> (strain K12)                                                              | Cytoplasm         |
| Phosphoribosyl 1,2-cyclic phosphate<br>phosphodiesterase | P16692 | <i>Escherichia coli</i> (strain K12)                                                              | Cytoplasm         |
| Malate dehydrogenase                                     | B1XHK9 | <i>Escherichia coli</i> (strain K12)                                                              | Periplasmic space |
| Phosphoenolpyruvate carboxylase                          | A1U2U4 | <i>Marinobacter nauticus</i> (strain<br>ATCC 700491 / DSM 11845 /<br>VT8)                         | Cytoplasm         |
| Dihydroorotate dehydrogenase (quinone)                   | Q8DLB7 | <i>Thermosynechococcus vestitus</i><br>(strain IAM M-273 / NIES-<br>2133 / BP-1)                  | Cytoplasm         |
| Glycerol kinase                                          | B9JZR4 | <i>Agrobacterium vitis</i> (strain S4 /<br>ATCC BAA-846)                                          | Cytoplasm         |
| NADPH-Fe(3+) oxidoreductase subunit<br>alpha             | Q74FU6 | <i>Geobacter sulfurreducens</i><br>(strain ATCC 51573 / DSM<br>12127 / PCA)                       | Cytoplasm         |
| ATP synthase subunit delta                               | A6H2D8 | <i>Flavobacterium psychrophilum</i><br>(strain ATCC 49511 / DSM<br>21280 / CIP 103535 / JIP02/86) | Plasma membrane   |
| Glucokinase                                              | C5BCK8 | <i>Edwardsiella ictaluri</i> (strain<br>93-146)                                                   | Cytoplasm         |

|                                                  |        |                                                                        |                 |
|--------------------------------------------------|--------|------------------------------------------------------------------------|-----------------|
| 1,4-alpha-glucan branching enzyme GlgB           | Q04KG8 | <i>Streptococcus pneumoniae</i><br>serotype 2 (strain D39 / NCTC 7466) | Cytoplasm       |
| PTS system glucose-specific EIICBA component     | P20166 | <i>Bacillus subtilis</i> (strain 168)                                  | Plasma membrane |
| Phosphoglycerate kinase                          | Q47XD4 | <i>Colwellia psychrerythraea</i><br>(strain 34H / ATCC BAA-681)        | Cytoplasm       |
| Succinate--CoA ligase [ADP-forming] subunit beta | A4W879 | <i>Enterobacter</i> sp. (strain 638)                                   | Cytoplasm       |
| ATP synthase gamma chain                         | Q31K49 | <i>Pseudoalteromonas translucida</i><br>(strain TAC 125)               | Plasma membrane |

### DNA metabolism

|                                                  |        |                                                                                                                                         |           |
|--------------------------------------------------|--------|-----------------------------------------------------------------------------------------------------------------------------------------|-----------|
| DNA base-flipping protein                        | P0AFP2 | <i>Escherichia coli</i> (strain K12)                                                                                                    | Unknown   |
| Transcription-repair-coupling factor             | P30958 | <i>Escherichia coli</i> (strain K12)                                                                                                    | Cytoplasm |
| Exodeoxyribonuclease I                           | Q2A0L0 | <i>Escherichia coli</i> (strain K12)                                                                                                    | Cytoplasm |
| Formamidopyrimidine-DNA glycosylase              | P42371 | <i>Lactococcus lactis</i> subsp.<br><i>cremoris</i>                                                                                     | Cytoplasm |
| DNA repair protein RecN                          | P17894 | <i>Bacillus subtilis</i> (strain 168)                                                                                                   | Cytoplasm |
| DNA mismatch repair protein MutS                 | Q38YR4 | <i>Latilactobacillus sakei</i> subsp.<br><i>sakei</i> (strain 23K)                                                                      | Cytoplasm |
| Protein RecA                                     | Q05358 | <i>Legionella pneumophila</i>                                                                                                           | Cytoplasm |
| DNA utilization protein HofM                     | P45753 | <i>Escherichia coli</i> (strain K12)                                                                                                    | Unknown   |
| RecBCD enzyme subunit RecB                       | P08394 | <i>Escherichia coli</i> (strain K12)                                                                                                    | Cytoplasm |
| 5'-3' exonuclease                                | P75403 | <i>Mycoplasma pneumoniae</i><br>(strain ATCC 29342 / M129)                                                                              | Cytoplasm |
| Exodeoxyribonuclease 7 large subunit             | Q2RIB5 | <i>Moorella thermoacetica</i> (strain<br>ATCC 39073 / JCM 9320)                                                                         | Cytoplasm |
| Crossover junction<br>endodeoxyribonuclease RuvC | Q820F5 | <i>Streptomyces avermitilis</i> (strain<br>ATCC 31267 / DSM 46492 /<br>JCM 5070 / NBRC 14893 /<br>NCIMB 12804 / NRRL 8165 /<br>MA-4680) | Cytoplasm |

### Cell signaling

|                                           |        |                                                            |                 |
|-------------------------------------------|--------|------------------------------------------------------------|-----------------|
| Signal recognition particle receptor FtsY | P75362 | <i>Mycoplasma pneumoniae</i><br>(strain ATCC 29342 / M129) | Plasma membrane |
|-------------------------------------------|--------|------------------------------------------------------------|-----------------|

|                                       |        |                                      |                     |
|---------------------------------------|--------|--------------------------------------|---------------------|
| Methyl-accepting chemotaxis protein I | P02942 | <i>Escherichia coli</i> (strain K12) | Cell inner membrane |
|---------------------------------------|--------|--------------------------------------|---------------------|

**Protein Biosynthesis and Metabolism**

|                           |        |                                                                                               |           |
|---------------------------|--------|-----------------------------------------------------------------------------------------------|-----------|
| 50S ribosomal protein L14 | P0ADY3 | <i>Escherichia coli</i> (strain K12)                                                          | Cytoplasm |
| 50S ribosomal protein L27 | P0ABI8 | <i>Escherichia coli</i> (strain K12)                                                          | Cytoplasm |
| Protein NrdI              | P0A772 | <i>Escherichia coli</i> (strain K12)                                                          | Unknown   |
| 50S ribosomal protein L16 | P41204 | <i>Mycoplasma pneumoniae</i><br>(strain ATCC 29342 / M129)                                    | Cytoplasm |
| 50S ribosomal protein L17 | Q59547 | <i>Mycoplasma pneumoniae</i><br>(strain ATCC 29342 / M129)                                    | Ribosome  |
| 50S ribosomal protein L22 | A8AQL2 | <i>Citrobacter koseri</i> (strain<br>ATCC BAA-895 / CDC 4225-<br>83 / SGSC4696)               | Ribosome  |
| 50S ribosomal protein L29 | Q6A6M8 | <i>Cutibacterium acnes</i> (strain<br>DSM 16379 / KPA171202)                                  | Ribosome  |
| 50S ribosomal protein L22 | Q3KLH4 | <i>Chlamydia trachomatis</i> serovar<br>A (strain ATCC VR-571B /<br>DSM 19440 / HAR-13)       | Ribosome  |
| Pup--protein ligase       | D1BS28 | <i>Xylanimonas cellulosilytica</i><br>(strain DSM 15894 / CECT<br>5975 / LMG 20990 / XIL07)   | Cytoplasm |
| 50S ribosomal protein L6  | Q88XX1 | <i>Lactiplantibacillus plantarum</i><br>(strain ATCC BAA-793 /<br>NCIMB 8826 / WCFS1)         | Ribosome  |
| 50S ribosomal protein L30 | B9K8A4 | <i>Thermotoga neapolitana</i> (strain<br>ATCC 49049 / DSM 4359 /<br>NBRC 107923 / NS-E)       | Ribosome  |
| 30S ribosomal protein S11 | Q9PJN3 | <i>Chlamydia muridarum</i> (strain<br>MoPn / Nigg)                                            | Ribosome  |
| Ribosome-recycling factor | C3MBQ5 | <i>Sinorhizobium fredii</i> (strain<br>NBRC 101917 / NGR234)                                  | Cytoplasm |
| LexA repressor            | B8HG97 | <i>Pseudarthrobacter</i><br><i>chlorophenolicus</i> (strain ATCC<br>700700 / DSM 12829 / CIP) | Cytoplasm |

|                                                                         |        |                                                                                                                            |                 |
|-------------------------------------------------------------------------|--------|----------------------------------------------------------------------------------------------------------------------------|-----------------|
| 50S ribosomal protein L15                                               | Q6CZY9 | 107037 / JCM 12360 / KCTC 9906 / NCIMB 13794 / A6)<br><i>Pectobacterium atrosepticum</i> (strain SCRI 1043 / ATCC BAA-672) | Ribosome        |
| Protein translocase subunit SecA                                        | Q8K9C4 | <i>Buchnera aphidicola</i> subsp. <i>Schizaphis graminum</i> (strain Sg)                                                   | Plasma membrane |
| 30S ribosomal protein S4                                                | B0C9F5 | <i>Acaryochloris marina</i> (strain MBIC 11017)                                                                            | Ribosome        |
| 30S ribosomal protein S11                                               | B3WAJ3 | <i>Lactocaseibacillus casei</i> (strain BL23)                                                                              | Ribosome        |
| 5,10-methylenetetrahydrofolate reductase                                | P0AEZ1 | <i>Escherichia coli</i> (strain K12)                                                                                       | Cytoplasm       |
| S-adenosylmethionine synthase                                           | B7UHY9 | <i>Escherichia coli</i> (strain K12)                                                                                       | Cytoplasm       |
| D-cysteine desulfhydrase                                                | P76316 | <i>Escherichia coli</i> (strain K12)                                                                                       | Cytoplasm       |
| Putative aminodehydroquinase synthase                                   | Q3J830 | <i>Amycolatopsis mediterranei</i> (strain S699)                                                                            | Cytoplasm       |
| Glutamate mutase epsilon subunit                                        | Q05509 | <i>Clostridium tetanomorphum</i>                                                                                           | Cytoplasm       |
| N-acetyl-gamma-glutamyl-phosphate reductase                             | A5WH78 | <i>Psychrobacter</i> sp. (strain PRwf-1)                                                                                   | Cytoplasm       |
| Tyrosine phenol-lyase                                                   | Q9CMK9 | <i>Pasteurella multocida</i> (strain Pm70)                                                                                 | Cytoplasm       |
| 3-dehydroquinase synthase                                               | A3PC83 | <i>Prochlorococcus marinus</i> (strain MIT 9301)                                                                           | Cytoplasm       |
| 3-isopropylmalate dehydratase large subunit                             | Q7VAV9 | <i>Prochlorococcus marinus</i> (strain SARG / CCMP1375 / SS120)                                                            | Cytoplasm       |
| Phosphoribosyl-ATP pyrophosphatase                                      | B1M0Q0 | <i>Methylobacterium radiotolerans</i> (strain ATCC 27329 / DSM 1819 / JCM 2831 / NBRC 15690 / NCIMB 10815 / 0-1)           | Cytoplasm       |
| 1D-myo-inositol 2-acetamido-2-deoxy-alpha-D-glucopyranoside deacetylase | D6Y7M2 | <i>Thermobispora bispora</i> (strain ATCC 19993 / DSM 43833 / CBS 139.67 / JCM 10125 / KCTC 9307 / NBRC 14880 / R51)       | Cytoplasm       |

| Chorismate synthase                                | Q0S0N2 | <i>Rhodococcus jostii</i> (strain RHA1)                                                                                   | Cytoplasm |
|----------------------------------------------------|--------|---------------------------------------------------------------------------------------------------------------------------|-----------|
| 3-phosphoshikimate 1-carboxyvinyltransferase       | B9MQK4 | <i>Caldicellulosiruptor bescii</i> (strain ATCC BAA-1888 / DSM 6725 / Z-1320)                                             | Cytoplasm |
| Glycine cleavage system H protein                  | A1T9T8 | <i>Mycolicibacterium vanbaalenii</i> (strain DSM 7251 / JCM 13017 / BCRC 16820 / KCTC 9966 / NRRL B-24157 / PYR-1)        | Cytoplasm |
| Selenide, water dikinase                           | C4ZDB0 | <i>Agathobacter rectalis</i> (strain ATCC 33656 / DSM 3377 / JCM 17463 / KCTC 5835 / VPI 0990)                            | Cytoplasm |
| Serine hydroxymethyltransferase                    | A6VXM6 | <i>Marinomonas</i> sp. (strain MWYL1)                                                                                     | Cytoplasm |
| Imidazole glycerol phosphate synthase subunit HisH | P60601 | <i>Rhodopseudomonas palustris</i> (strain ATCC BAA-98 / CGA009)                                                           | Cytoplasm |
| Glutamine synthetase                               | P10583 | <i>Azospirillum brasilense Symbiobacterium</i>                                                                            | Cytoplasm |
| Arginine biosynthesis bifunctional protein ArgJ    | Q67KC5 | <i>thermophilum</i> (strain T / IAM 14863)                                                                                | Cytoplasm |
| 3-phosphoshikimate 1-carboxyvinyltransferase       | B8D9A1 | <i>Buchnera aphidicola</i> subsp. <i>Acyrtosiphon pisum</i> (strain 5A)                                                   | Cytoplasm |
| Dihydroxy-acid dehydratase                         | Q2SA20 | <i>Hahella chejuensis</i> (strain KCTC 2396)                                                                              | Cytoplasm |
| Carbamoyl-phosphate synthase small chain           | B2URJ0 | <i>Akkermansia muciniphila</i> (strain ATCC BAA-835 / DSM 22959 / JCM 33894 / BCRC 81048 / CCUG 64013 / CIP 107961 / Muc) | Cytoplasm |
| Phosphoribosyl-AMP cyclohydrolase                  | P62392 | <i>Leptospira interrogans</i> serogroup <i>Icterohaemorrhagiae</i> serovar <i>copenhageni</i> (strain Fiocruz L1-130)     | Cytoplasm |
| Argininosuccinate synthase                         | Q63U95 | <i>Burkholderia pseudomallei</i> (strain K96243)                                                                          | Cytoplasm |

|                                                            |        |                                                                                                           |                 |
|------------------------------------------------------------|--------|-----------------------------------------------------------------------------------------------------------|-----------------|
| Glycine--tRNA ligase beta subunit                          | P00961 | <i>Escherichia coli</i> (strain K12)                                                                      | Cytoplasm       |
| Phosphoenolpyruvate-dependent<br>phosphotransferase system | P37177 | <i>Escherichia coli</i> (strain K12)                                                                      | Cytoplasm       |
| Methionyl-tRNA formyltransferase                           | P75235 | <i>Mycoplasma pneumoniae</i><br>(strain ATCC 29342 / M129)                                                | Cytoplasm       |
| GTPase Era                                                 | Q97JI5 | <i>Clostridium acetobutylicum</i><br>(strain ATCC 824 / DSM 792 /<br>JCM 1419 / LMG 5710 / VKM<br>B-1787) | Plasma membrane |

### **Regulation Factor and RNA Processing**

|                                                      |        |                                                                                       |           |
|------------------------------------------------------|--------|---------------------------------------------------------------------------------------|-----------|
| Ribosomal RNA large subunit<br>methyltransferase K/L | P0A8I8 | <i>Escherichia coli</i> (strain K12)                                                  | Cytoplasm |
| tRNA-modifying protein YgfZ                          | P75810 | <i>Escherichia coli</i> (strain K12)                                                  | Cytoplasm |
| RNA 2'-phosphotransferase                            | P39380 | <i>Escherichia coli</i> (strain K12)                                                  | Unknown   |
| Ribonuclease J                                       | P75497 | <i>Mycoplasma pneumoniae</i><br>(strain ATCC 29342 / M129)                            | Cytoplasm |
| Elongation factor Tu 1                               | P0CE47 | <i>Escherichia coli</i> O139:H28<br>(strain E24377A / ETEC)                           | Cytoplasm |
| Elongation factor G                                  | Q492B1 | <i>Blochmannia pennsylvanicus</i><br>(strain BPEN)                                    | Cytoplasm |
| Phenylalanine--tRNA ligase alpha subunit             | Q88WM8 | <i>Lactiplantibacillus plantarum</i><br>(strain ATCC BAA-793 /<br>NCIMB 8826 / WCFS1) | Cytoplasm |
| Phenylalanine--tRNA ligase beta subunit              | P59505 | <i>Buchnera aphidicola</i> subsp.<br><i>Baizongia pistaciae</i> (strain Bp)           | Cytoplasm |
| Elongation factor 4                                  | C3K6G8 | <i>Pseudomonas fluorescens</i><br>(strain SBW25)                                      | Cytoplasm |
| tRNA modification GTPase MnmE                        | Q1MPF1 | <i>Lawsonia intracellularis</i> (strain<br>PHE/MN1-00)                                | Cytoplasm |

### **Transferase**

|                                                     |        |                                      |           |
|-----------------------------------------------------|--------|--------------------------------------|-----------|
| L-carnitine CoA-transferase                         | P31572 | <i>Escherichia coli</i> (strain K12) | Cytoplasm |
| Phosphate acetyltransferase EutD                    | P77218 | <i>Escherichia coli</i> (strain K12) | Cytoplasm |
| Protein adenyltransferase SelO                      | Q0THC2 | <i>Escherichia coli</i> (strain K12) | Unknown   |
| 3-methyl-2-oxobutanoate<br>hydroxymethyltransferase | P31057 | <i>Escherichia coli</i> (strain K12) | Cytoplasm |



|                                                                               |        |                                                                                                                                |                 |
|-------------------------------------------------------------------------------|--------|--------------------------------------------------------------------------------------------------------------------------------|-----------------|
| Nicotinate-nucleotide--<br>dimethylbenzimidazole<br>phosphoribosyltransferase | P36562 | <i>Escherichia coli</i> (strain K12)                                                                                           | Cytoplasm       |
| Putative acetyltransferase MPN_114                                            | P75448 | <i>Mycoplasma pneumoniae</i><br>(strain ATCC 29342 / M129)                                                                     | Cytoplasm       |
| Ornithine carbamoyltransferase                                                | Q93JF1 | <i>Streptomyces coelicolor</i> (strain<br>ATCC BAA-471 / A3(2) /<br>M145)                                                      | Cytoplasm       |
| Sulfate adenylyltransferase                                                   | A5D5R7 | <i>Pelotomaculum</i><br><i>thermopropionicum</i> (strain<br>DSM 13744 / JCM 10971 / SI)                                        | Cytoplasm       |
| 4-diphosphocytidyl-2-C-methyl-D-<br>erythritol kinase                         | Q1LTH3 | <i>Baumannia cicadellinica</i><br><i>subsp. Homalodisca coagulata</i>                                                          | Unknown         |
| 1-deoxy-D-xylulose-5-phosphate synthase                                       | A3MYS9 | <i>Actinobacillus</i><br><i>pleuropneumoniae serotype 5b</i><br>(strain L20)                                                   | Cytoplasm       |
| Phosphatidylglycerol--prolipoprotein<br>diacylglyceryl transferase            | Q8NNU2 | <i>Corynebacterium glutamicum</i><br>(strain ATCC 13032 / DSM<br>20300 / BCRC 11384 / JCM<br>1318 / LMG 3730 / NCIMB<br>10025) | Cytoplasm       |
| <b><u>Light dependent process</u></b>                                         |        |                                                                                                                                |                 |
| Light-independent protochlorophyllide<br>reductase subunit N                  | Q7V2D5 | <i>Prochlorococcus marinus</i><br><i>subsp. pastoris</i> (strain<br>CCMP1986 / NIES-2087 /<br>MED4)                            | Cytoplasm       |
| Glutamyl-tRNA reductase                                                       | A5UU33 | <i>Roseiflexus sp.</i> (strain RS-1)                                                                                           | Cytoplasm       |
| <b><u>Transmembrane transporters</u></b>                                      |        |                                                                                                                                |                 |
| p-hydroxybenzoic acid efflux pump<br>subunit AaeB                             | P46481 | <i>Escherichia coli</i> (strain K12)                                                                                           | Plasma membrane |
| D-galactose-binding periplasmic protein                                       | P0AEE5 | <i>Escherichia coli</i> (strain K12)                                                                                           | Cytoplasm       |
| Inner membrane transport protein RhmT                                         | P76470 | <i>Escherichia coli</i> (strain K12)                                                                                           | Plasma membrane |

|                                                       |        |                                                                                                              |                     |
|-------------------------------------------------------|--------|--------------------------------------------------------------------------------------------------------------|---------------------|
| Putative outer membrane porin protein NmpC            | P21420 | <i>Escherichia coli</i> (strain K12)                                                                         | Cell outer membrane |
| Thiosulfate-binding protein                           | P16700 | <i>Escherichia coli</i> (strain K12)                                                                         | Plasma membrane     |
| Oligopeptide transport ATP-binding protein OppF       | P75551 | <i>Mycoplasma pneumoniae</i> (strain ATCC 29342 / M129)                                                      | Plasma membrane     |
| Spermidine/putrescine import ATP-binding protein PotA | P75059 | <i>Mycoplasma pneumoniae</i> (strain ATCC 29342 / M129)                                                      | Plasma membrane     |
| Phosphate import ATP-binding protein PstB 1           | Q8RCU0 | <i>Caldanaerobacter subterraneus subsp. tengcongensis</i> (strain DSM 15242 / JCM 11007 / NBRC 100824 / MB4) | Plasma membrane     |
| Fe(3+) ions import ATP-binding protein FbpC 2         | Q6D2F6 | <i>Pectobacterium atrosepticum</i> (strain SCRI 1043 / ATCC BAA-672)                                         | Plasma membrane     |

#### **DNA replication**

|                                  |        |                                                         |                   |
|----------------------------------|--------|---------------------------------------------------------|-------------------|
| DNA adenine methylase            | P0AEE8 | <i>Escherichia coli</i> (strain K12)                    | Periplasmic space |
| 50S ribosomal protein L2         | P60422 | <i>Escherichia coli</i> (strain K12)                    | Cytoplasm         |
| Probable DNA helicase II homolog | P75437 | <i>Mycoplasma pneumoniae</i> (strain ATCC 29342 / M129) | Cytoplasm         |

#### **Regulation of transcription**

|                                           |        |                                                                     |                   |
|-------------------------------------------|--------|---------------------------------------------------------------------|-------------------|
| Arabinose operon regulatory protein       | P0A9E0 | <i>Escherichia coli</i> (strain K12)                                | Cytoplasm         |
| HTH-type transcriptional regulator GadX   | P37639 | <i>Escherichia coli</i> (strain K12)                                | Cytoplasm         |
| Periplasmic protein TorT                  | P38683 | <i>Escherichia coli</i> (strain K12)                                | Periplasmic space |
| DNA-directed RNA polymerase subunit alpha | P0A7Z4 | <i>Escherichia coli</i> (strain K12)                                | Cytoplasm         |
| Putative acyl-CoA dehydrogenase AidB      | P33224 | <i>Escherichia coli</i> (strain K12)                                | Cytoplasm         |
| Antitoxin VapB2                           | O07227 | <i>Mycobacterium tuberculosis</i> (strain ATCC 25618 / H37Rv)       | Unknown           |
| HTH-type transcriptional regulator BetI   | B7VQ27 | <i>Vibrio atlanticus</i> (strain LGP32)                             | Cytoplasm         |
| Catabolite control protein A              | O07329 | <i>Streptococcus mutans serotype c</i> (strain ATCC 700610 / UA159) | Cytoplasm         |

|                                                                 |        |                                                                       |                     |
|-----------------------------------------------------------------|--------|-----------------------------------------------------------------------|---------------------|
| DNA-directed RNA polymerase subunit beta'                       | Q0BUQ5 | <i>Granulibacter bethesdensis</i><br>(strain ATCC BAA-1260 / CGDNIH1) | Cytoplasm           |
| <b><u>Antibiotics biosynthesis</u></b>                          |        |                                                                       |                     |
| Cytochrome P-450 monooxygenase DoxA                             | Q93MI2 | <i>Streptomyces peucetius subsp. caesius</i>                          | Cytoplasm           |
| <b><u>Nucleotide metabolism</u></b>                             |        |                                                                       |                     |
| Allantoate amidohydrolase                                       | P77425 | <i>Escherichia coli</i> (strain K12)                                  | Cytoplasm           |
| Bifunctional protein FOLD                                       | P75096 | <i>Mycoplasma pneumoniae</i><br>(strain ATCC 29342 / M129)            | Cytoplasm           |
| Thymidylate kinase                                              | Q6FZU8 | <i>Bartonella quintana</i> (strain Toulouse)                          | Cytoplasm           |
| dTTP/UTP pyrophosphatase                                        | Q82ZA4 | <i>Enterococcus faecalis</i> (strain ATCC 700802 / V583)              | Cytoplasm           |
| Phosphoribosylamine--glycine ligase                             | P15640 | <i>Escherichia coli</i> (strain K12)                                  | Cytoplasm           |
| Phosphotransferase RcsD                                         | P39838 | <i>Escherichia coli</i> (strain K12)                                  | Plasma membrane     |
| DNA translocase FtsK 2                                          | Q8XWX9 | <i>Ralstonia solanacearum</i> (strain GM11000)                        | Plasma membrane     |
| Dihydroorotase                                                  | P96081 | <i>Thermus aquaticus</i>                                              | Cytoplasm           |
| <b><u>Pathogenesis</u></b>                                      |        |                                                                       |                     |
| LPS-assembly protein LptD                                       | P31554 | <i>Escherichia coli</i> (strain K12)                                  | Cell outer membrane |
| 3-deoxy-D-manno-octulosonic acid kinase                         | Q9PBJ1 | <i>Xylella fastidiosa</i> (strain 9a5c)                               | Plasma membrane     |
| T-DNA border endonuclease VirD2                                 | P18592 | <i>Agrobacterium fabrum</i> (strain C58 / ATCC 33970)                 | Cytoplasm           |
| <b><u>Cell wall organization and structural maintenance</u></b> |        |                                                                       |                     |
| D-alanyl-D-alanine dipeptidase                                  | P77790 | <i>Escherichia coli</i> (strain K12)                                  | Cytoplasm           |

|                                                                      |        |                                                                 |                            |
|----------------------------------------------------------------------|--------|-----------------------------------------------------------------|----------------------------|
| 1,6-anhydro-N-acetylmuramyl-L-alanine<br>amidase AmpD                | P13016 | <i>Escherichia coli</i> (strain K12)                            | Cytoplasm                  |
| Membrane-bound lytic murein<br>transglycosylase F                    | P0AGC5 | <i>Escherichia coli</i> (strain K12)                            | Cell outer membrane        |
| Undecaprenyl-diphosphatase                                           | G0FS62 | <i>Amycolatopsis mediterranei</i><br>(strain S699)              | Plasma membrane            |
| <b><u>Lipid metabolism</u></b>                                       |        |                                                                 |                            |
| Acyl carrier protein phosphodiesterase                               | B1XEZ2 | <i>Escherichia coli</i> (strain K12)                            | Cytoplasm                  |
| Crotonobetainyl-CoA reductase                                        | P60584 | <i>Escherichia coli</i> (strain K12)                            | Cytoplasm                  |
| Bifunctional polymyxin resistance protein<br>ArnA                    | P77398 | <i>Escherichia coli</i> (strain K12)                            | Protein containing complex |
| Long-chain-fatty-acid--CoA ligase                                    | P69451 | <i>Escherichia coli</i> (strain K12)                            | Cytoplasm                  |
| Medium/long-chain-fatty-acid--[acyl-<br>carrier-protein] ligase MbtM | P0A4X9 | <i>Mycobacterium bovis</i> (strain<br>ATCC BAA-935 / AF2122/97) | Plasma membrane            |
| Phosphatidylglycerol--prolipoprotein<br>diacylglycerol transferase   | Q17X31 | <i>Helicobacter acinonychis</i><br>(strain Sheeba)              | Plasma membrane            |
| <b><u>Unknown</u></b>                                                |        |                                                                 |                            |
| Putative lipoprotein YfiB                                            | P07021 | <i>Escherichia coli</i> (strain K12)                            | Plasma membrane            |
| Putative aminopeptidase FrvX                                         | P32153 | <i>Escherichia coli</i> (strain K12)                            | Cytoplasm                  |
| Probable ATP-binding protein YheS                                    | P63389 | <i>Escherichia coli</i> (strain K12)                            | Cytoplasm                  |
| Ureidoglycolate dehydrogenase (NAD(+))                               | W1F386 | <i>Escherichia coli</i> (strain K12)                            | Cytoplasm                  |
| Inner membrane protein YbjJ                                          | P75810 | <i>Escherichia coli</i> (strain K12)                            | Plasma membrane            |
| Probable lipoprotein YiaD                                            | P37665 | <i>Escherichia coli</i> (strain K12)                            | Plasma membrane            |
| tRNA-dihydrouridine(20/20a) synthase                                 | P32695 | <i>Escherichia coli</i> (strain K12)                            | Cytoplasm                  |
| Putative phosphatase MPN_427                                         | P75360 | <i>Mycoplasma pneumoniae</i><br>(strain ATCC 29342 / M129)      | Cytoplasm                  |
| Putative MgpC-like protein MPN_092                                   | P75600 | <i>Mycoplasma pneumoniae</i><br>(strain ATCC 29342 / M129)      | Unknown                    |
| Probable ATP-dependent RNA helicase<br>MG308 homolog                 | P75335 | <i>Mycoplasma pneumoniae</i><br>(strain ATCC 29342 / M129)      | Cytoplasm                  |
| Phosphoenolpyruvate-protein<br>phosphotransferase                    | P75168 | <i>Mycoplasma pneumoniae</i><br>(strain ATCC 29342 / M129)      | Cytoplasm                  |

|                                                        |        |                                                                                                          |                 |
|--------------------------------------------------------|--------|----------------------------------------------------------------------------------------------------------|-----------------|
| Putative esterase/lipase 1                             | P75333 | <i>Mycoplasma pneumoniae</i><br>(strain ATCC 29342 / M129)                                               | Unknown         |
| ATP synthase subunit alpha                             | Q50329 | <i>Mycoplasma pneumoniae</i><br>(strain ATCC 29342 / M129)                                               | Plasma membrane |
| Acyl carrier protein homolog                           | P75378 | <i>Mycoplasma pneumoniae</i><br>(strain ATCC 29342 / M129)                                               | Plasma membrane |
| Protein MPN_376                                        | P75405 | <i>Mycoplasma pneumoniae</i><br>(strain ATCC 29342 / M129)                                               | Cytoplasm       |
| UPF0597 protein DP0591                                 | Q6AQQ3 | <i>Desulfotalea psychrophila</i><br>(strain LSv54 / DSM 12343)                                           | Cytoplasm       |
| L-lactate oxidase                                      | C0XIJ3 | <i>Lentilactobacillus hilgardii</i><br>(strain ATCC 8290)                                                | Cytoplasm       |
| Flagellin                                              | P06175 | <i>Salmonella rubislaw</i>                                                                               | Extracellular   |
| 5-methylthioadenosine/S-adenosylhomocysteine deaminase | A4J675 | <i>Desulfotomaculum reducens</i><br>(strain MI-1)                                                        | Cytoplasm       |
| Surface layer protein                                  | P38538 | <i>Brevibacillus choshinensis</i>                                                                        | Extracellular   |
| ESX-5 secretion system protein EccA5                   | P63745 | <i>Mycobacterium bovis</i> (strain ATCC BAA-935 / AF2122/97)                                             | Cytoplasm       |
| Protein adenyltransferase SelO                         | Q1H0D2 | <i>Methylobacillus flagellatus</i><br>(strain KT / ATCC 51484 / DSM 6875)                                | Cytoplasm       |
| Sugar fermentation stimulation protein homolog         | A6W2V7 | <i>Marinomonas</i> sp. (strain MWYL1)                                                                    | Cytoplasm       |
| Phase 2 flagellin                                      | P52615 | <i>Salmonella abortus-equi</i>                                                                           | Extracellular   |
| Putative membrane protein insertion efficiency factor  | Q11JM2 | <i>Chelativorans</i> sp. (strain BNC1)                                                                   | Plasma membrane |
| UPF0358 protein BH2626                                 | Q9K9L9 | <i>Alkalihalobacillus halodurans</i><br>(strain ATCC BAA-125 / DSM 18197 / FERM 7344 / JCM 9153 / C-125) | Cytoplasm       |
| UPF0114 protein PC1_0431                               | C6DJS4 | <i>Pectobacterium carotovorum</i> subsp. <i>carotovorum</i> (strain PC1)                                 | Plasma membrane |
| D-threo-3-hydroxyaspartate dehydratase                 | B2DFG5 | <i>Delftia</i> sp. (strain HT23)                                                                         | Cytoplasm       |
| Methionine import ATP-binding protein MetN 1           | Q63H29 | <i>Bacillus cereus</i> (strain ZK / E33L)                                                                | Plasma membrane |
| FHA domain-containing protein FhaB                     | A0QNG6 | <i>Mycobacterium smegmatis</i><br>(strain ATCC 700084 / mc(2)155)                                        | Plasma membrane |

---
